# Supplementary material for: USP36 facilitates esophageal squamous carcinoma progression via stabilizing YAP
Source: PubMed Central journal article supplement (PMC9722938; doi:10.1038/s41419-022-05474-5), 2022-12-05

Figure.2B

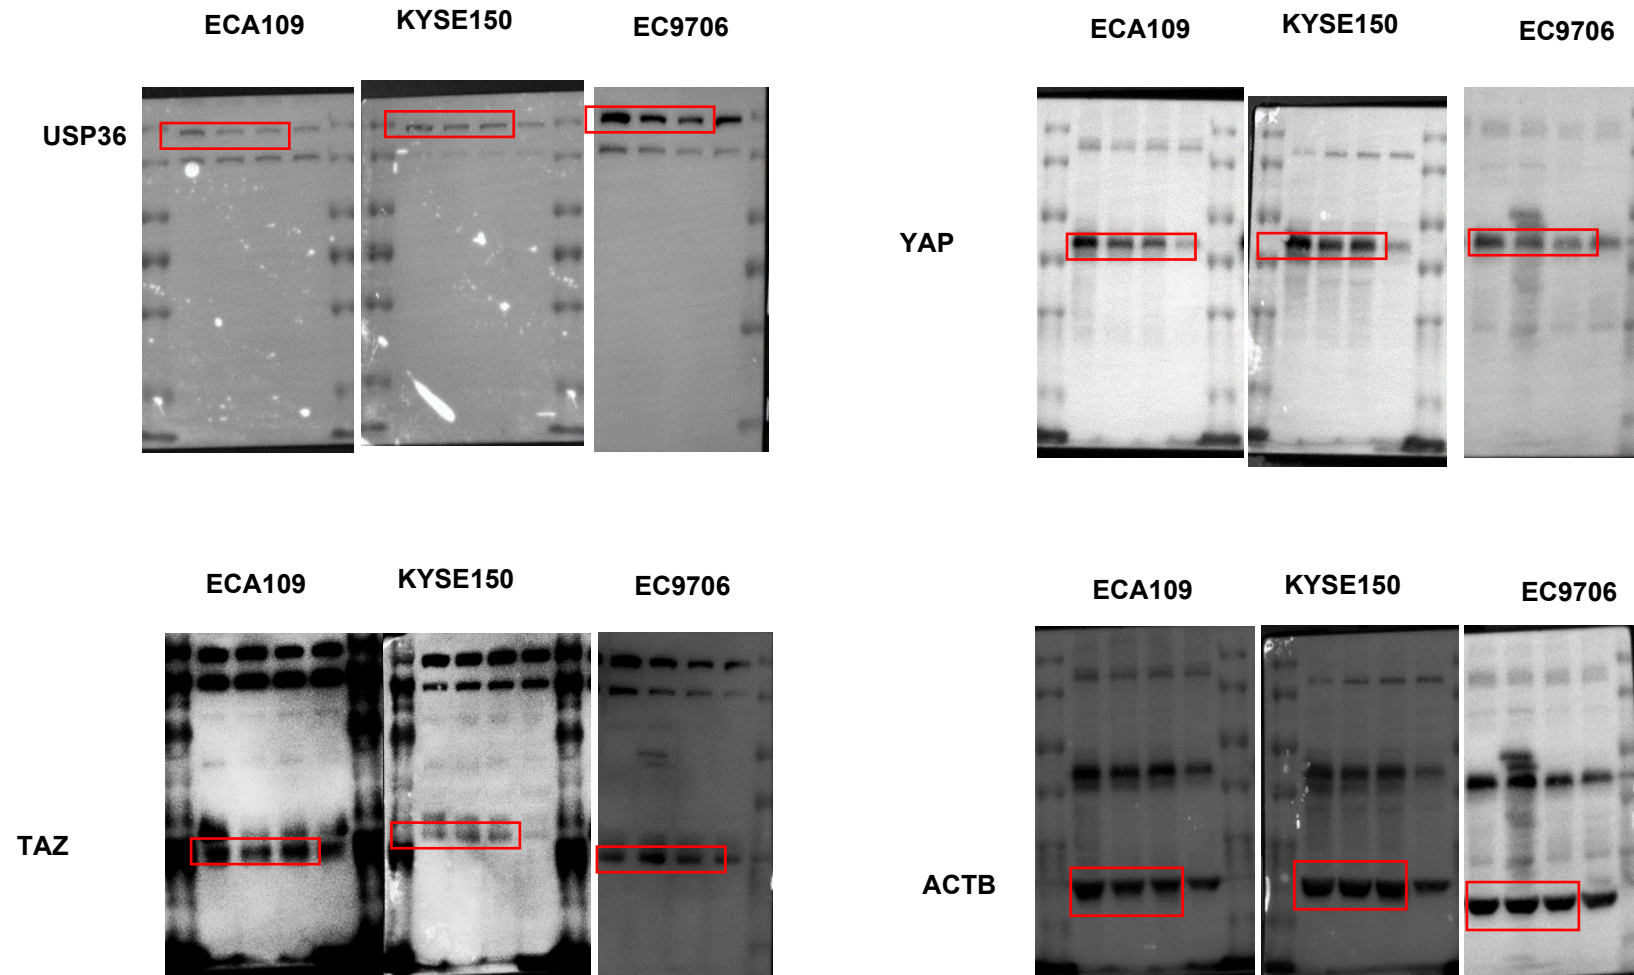

**Figure.2F**

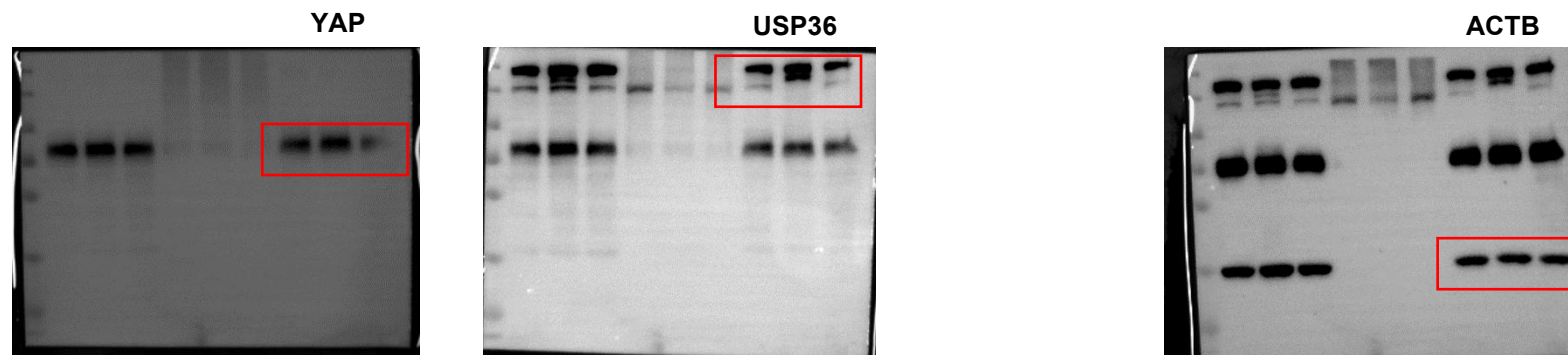

**Figure.4J**

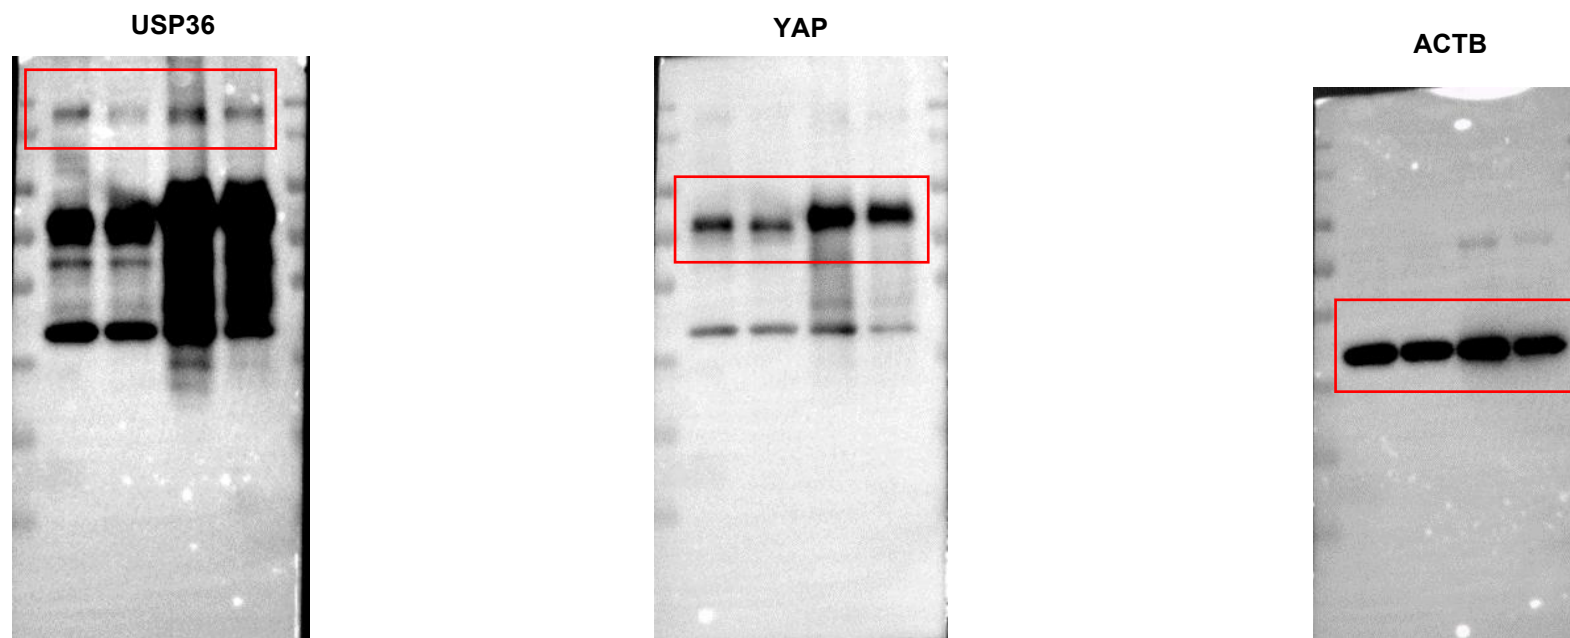

Figure.5B

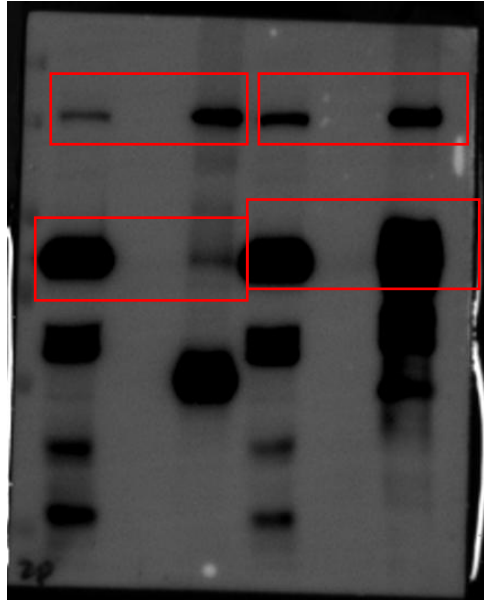

Figure.5C

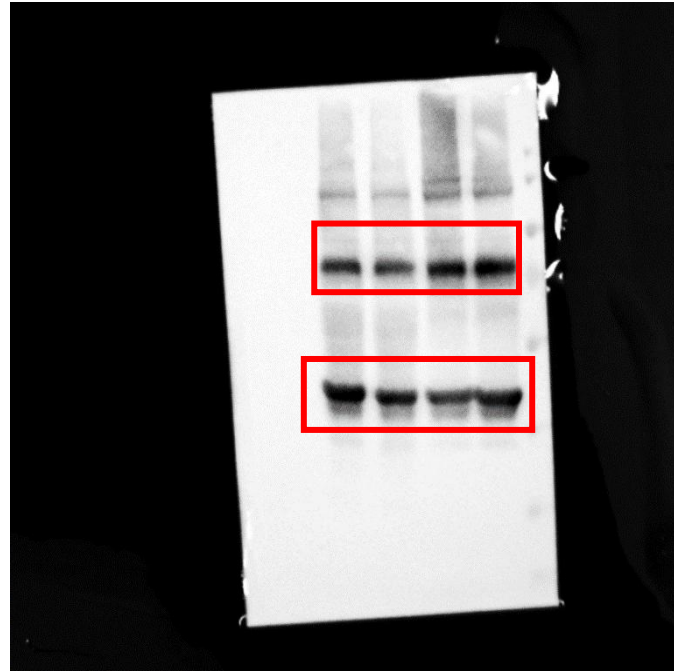

Figure.5D

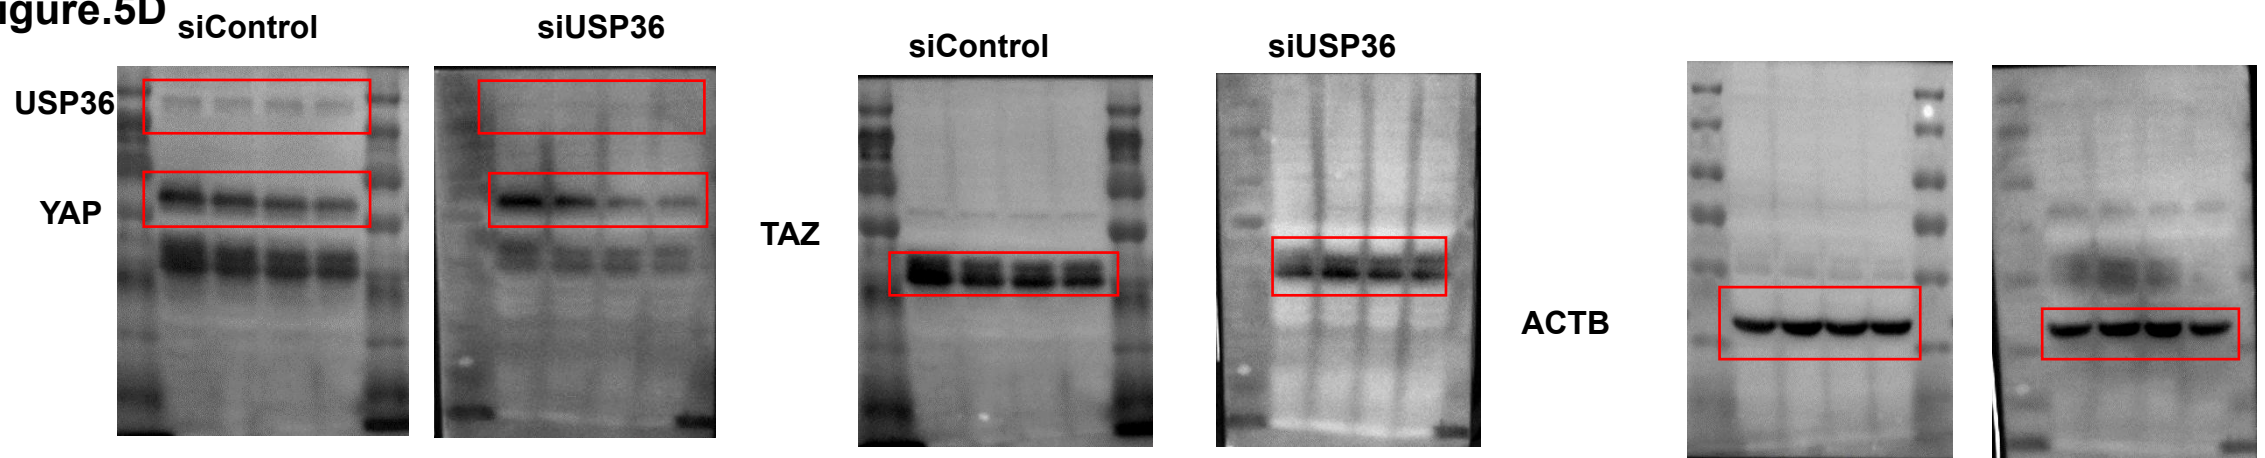

Figure.5E

Input-Myc

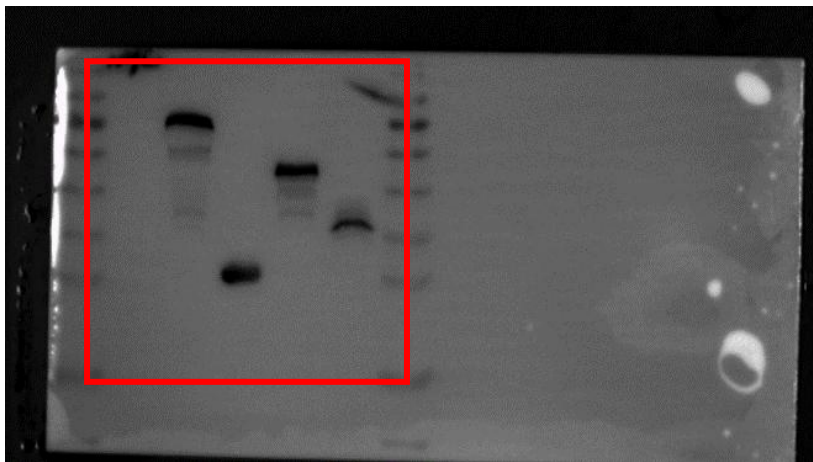

Input-Flag

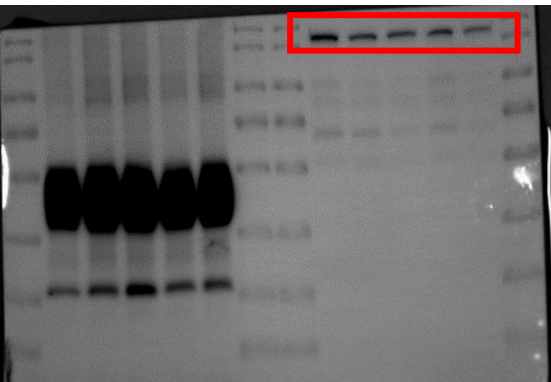

Input-ACTB

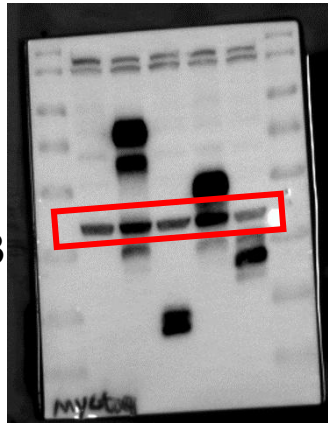

IP-Flag

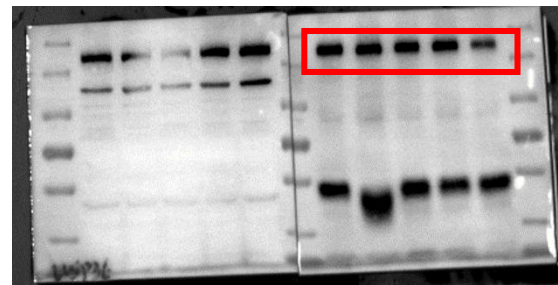

IP-Myc

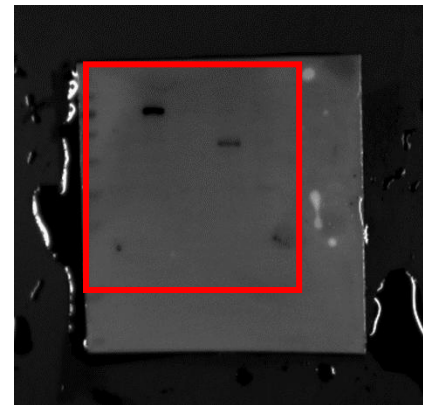



Figure.5F

Input-Flag

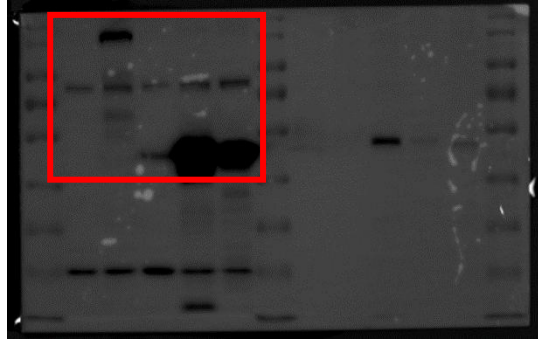

IP-Myc

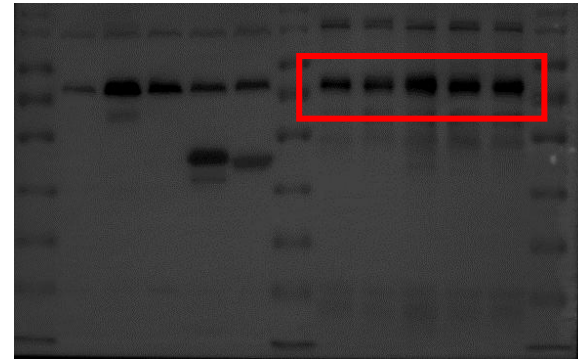

Input-Myc

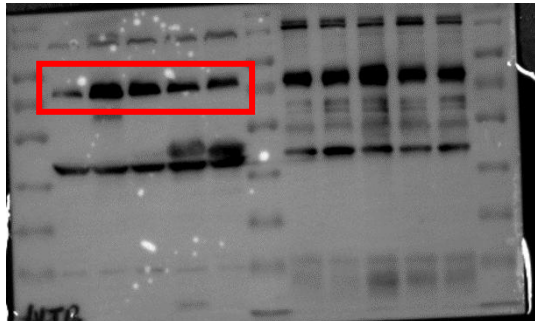

IP-Flag

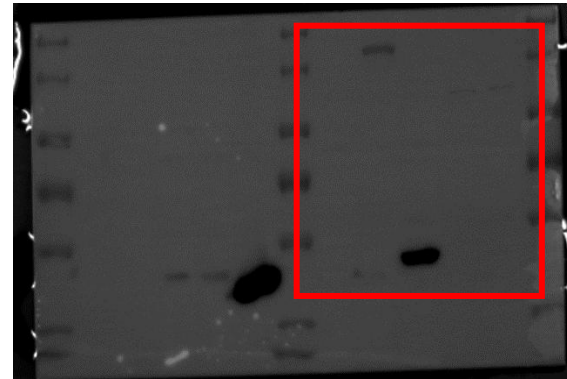

Input-ACTB

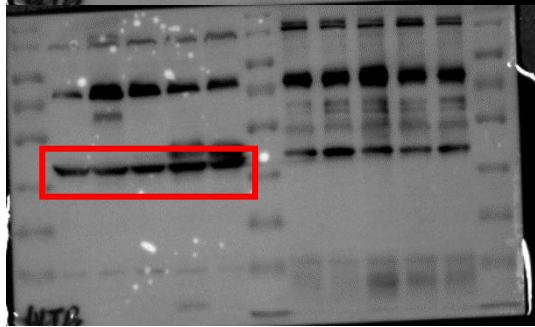

Figure.5G

YAP

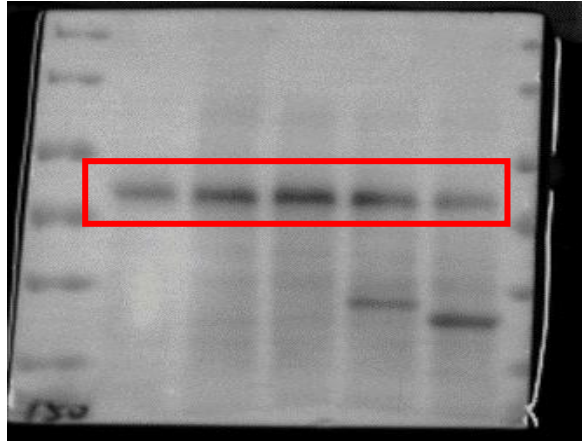

Flag

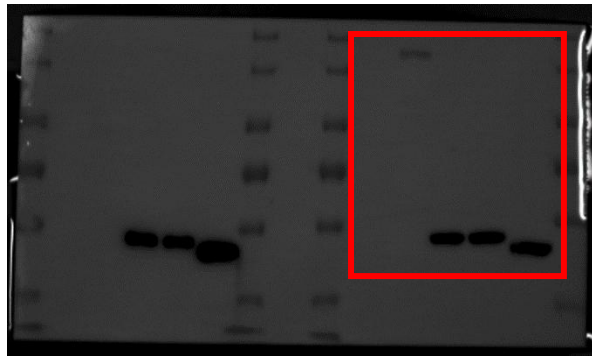

ACTB

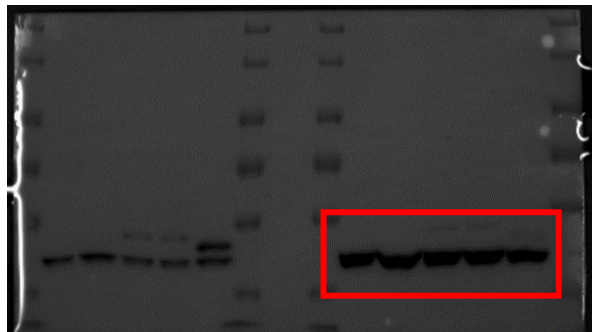

Figure.5I

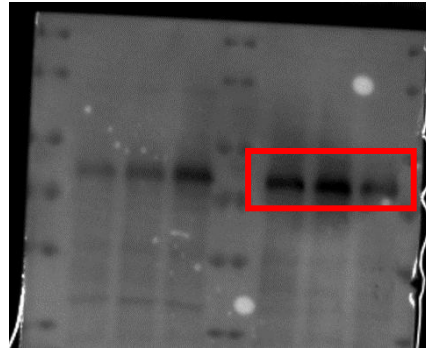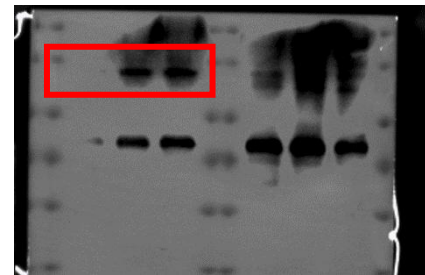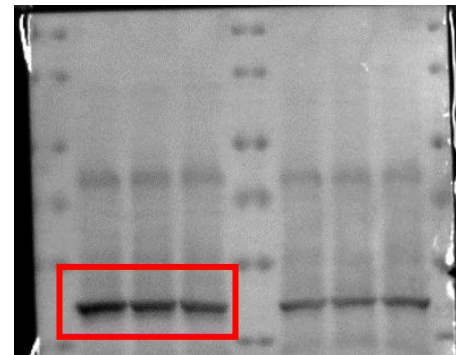

Figure.6A

IP:YAP  
IB:HA

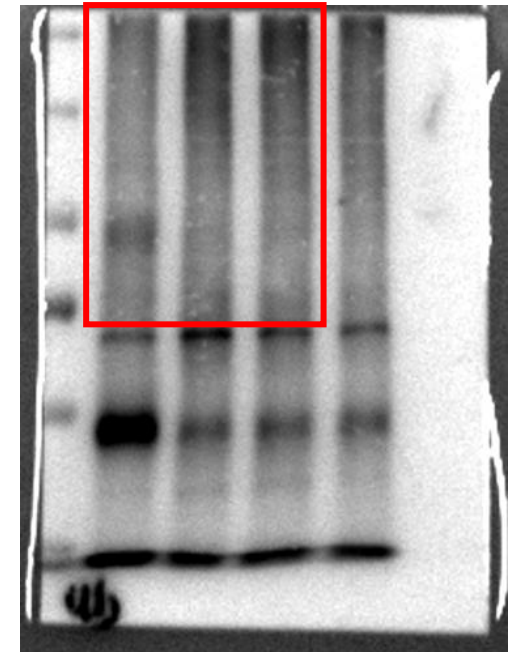

Input USP36

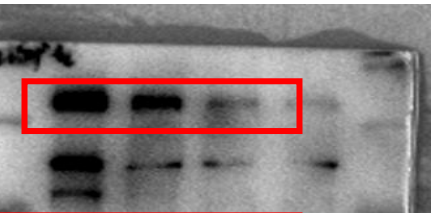

Input YAP

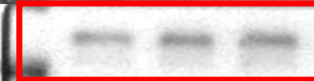

Input ACTB

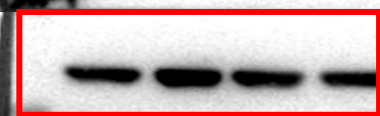

Figure.6B,C,D

B:HA

C:HA

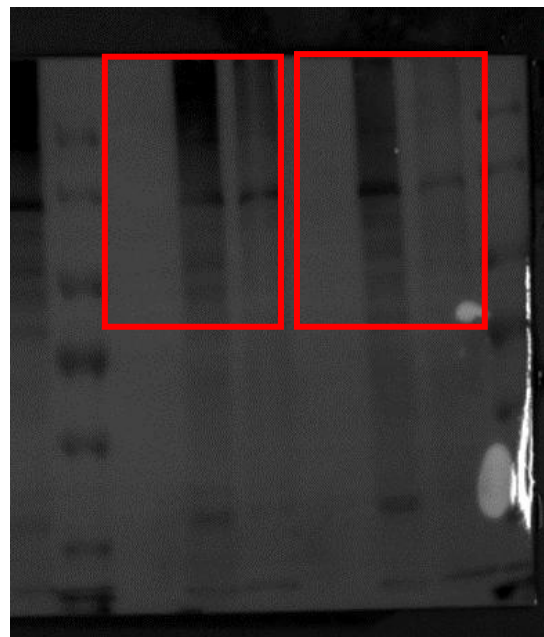

D:HA

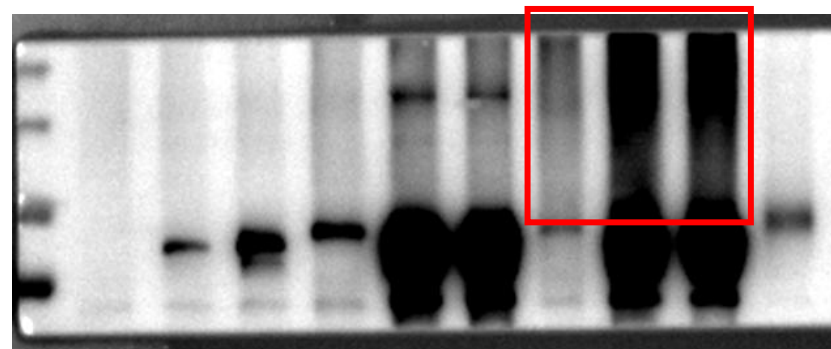

Input

B

C

D

Myc

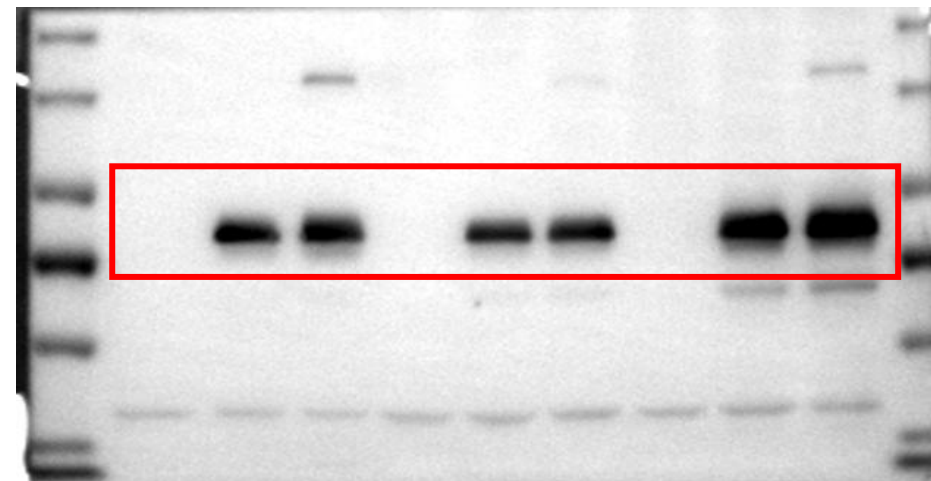

Flag

ACTB

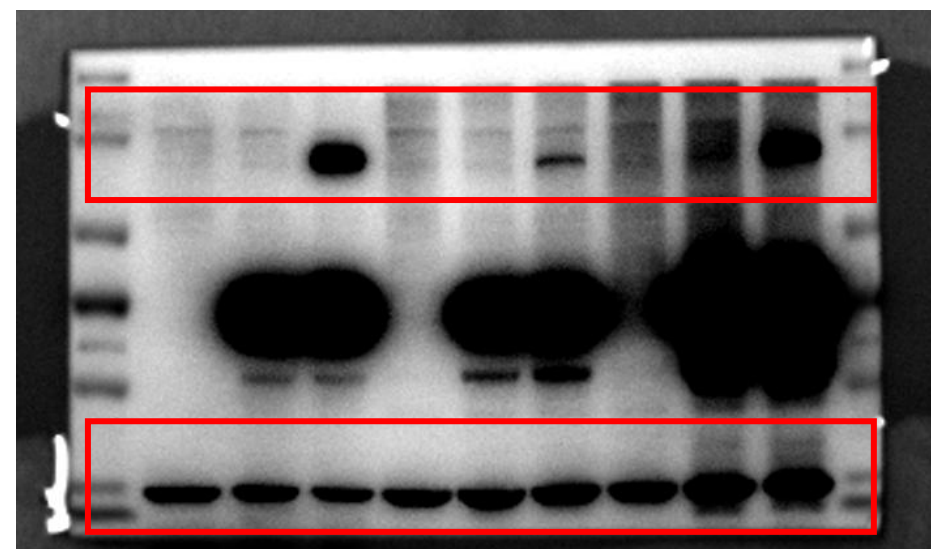



Figure.6E,F

E:HA

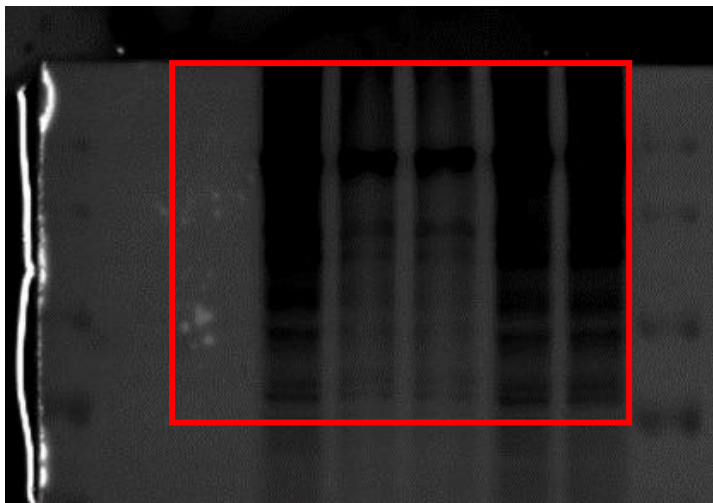

E:FLAG

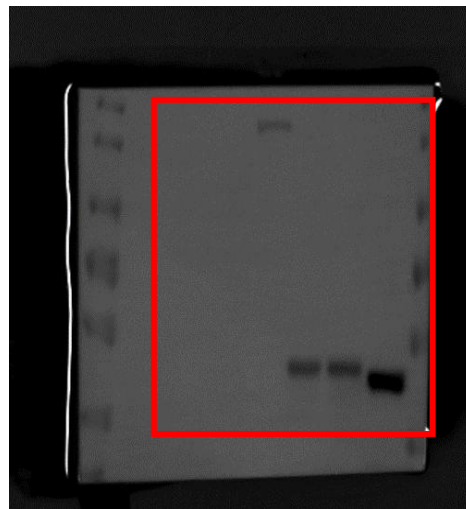

F:HA

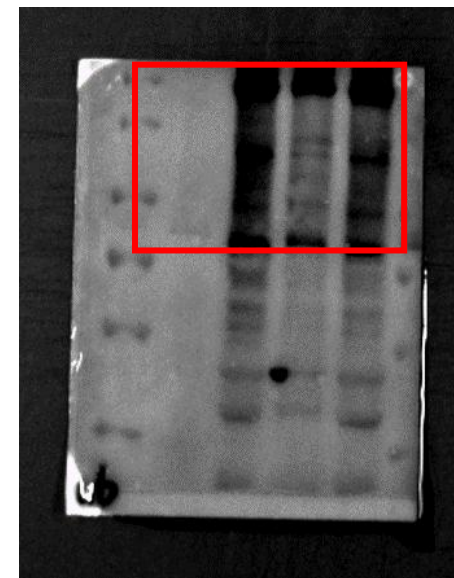

E:MYC

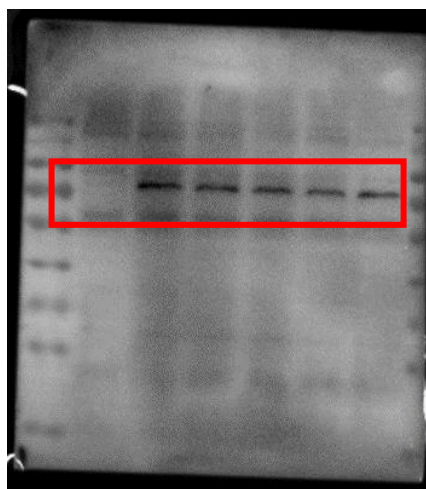

E:ACTB

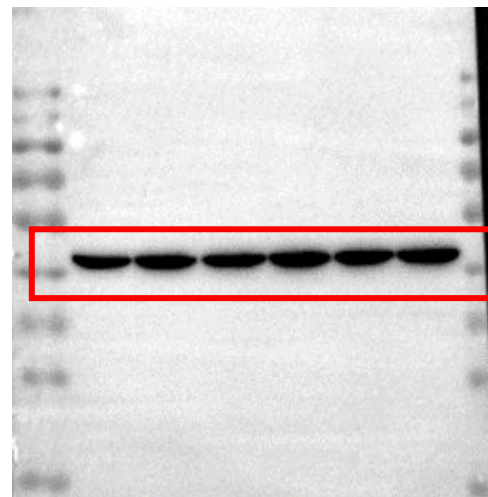

F:FLAG

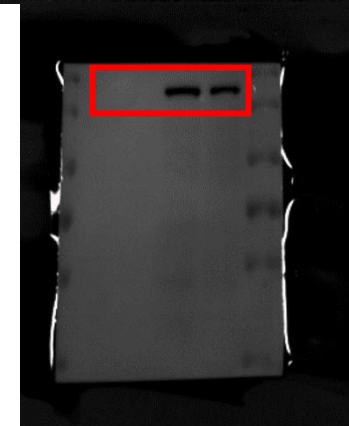



Figure.S1C

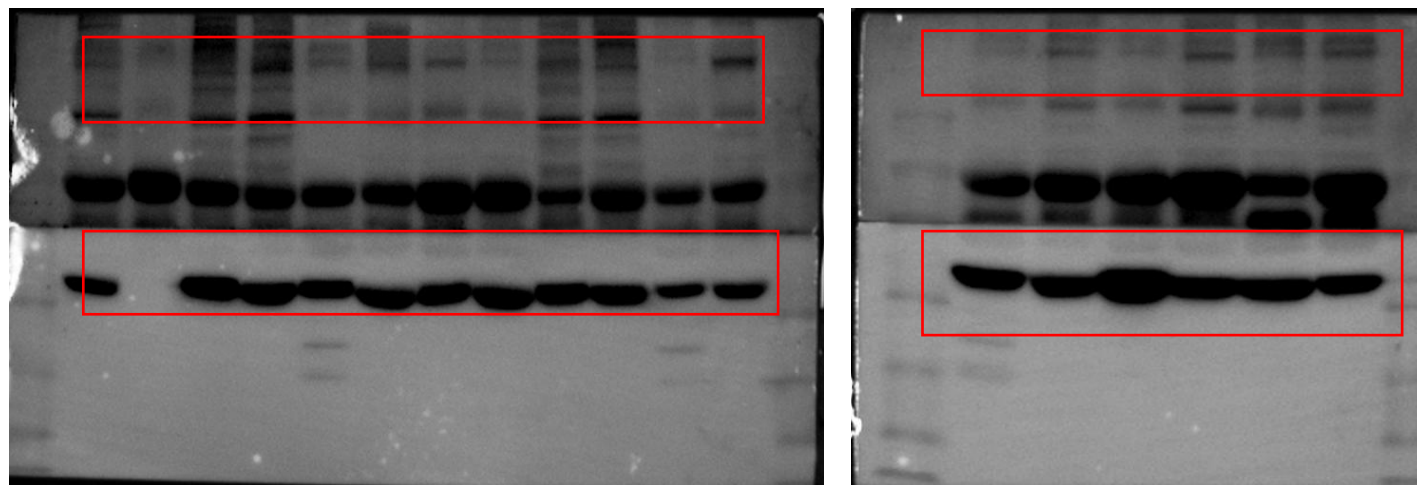

Figure.S2A

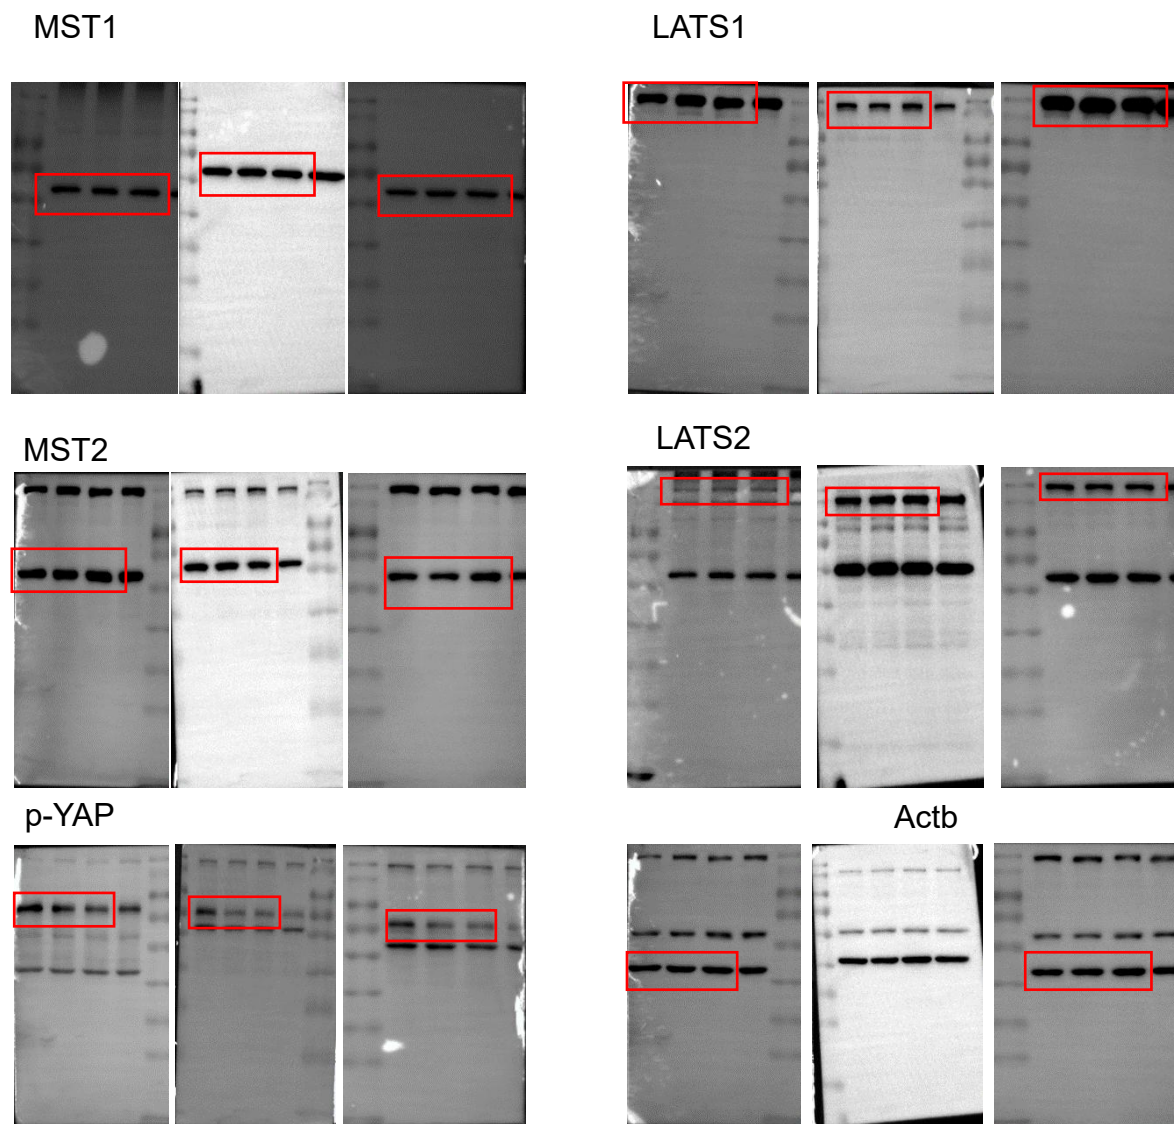

Figure.S2B

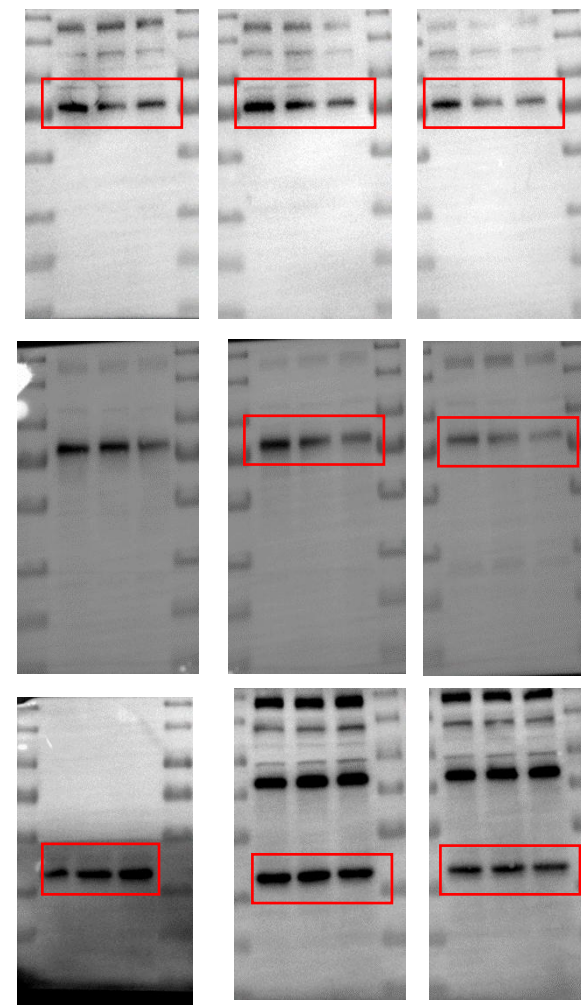

**Figure.S2H**

**ECA109**

**KYSE150**

**EC9706**

**Casepase3**

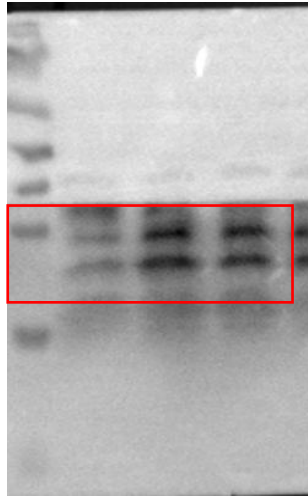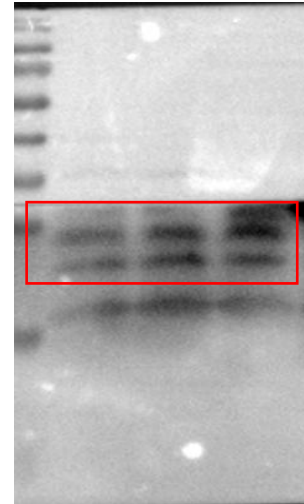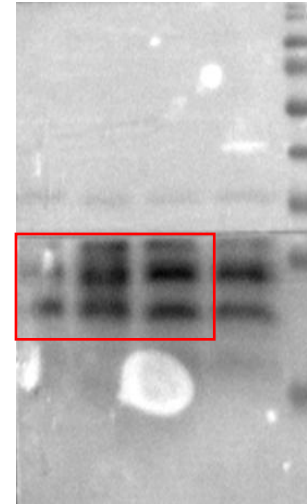

**ACTB**

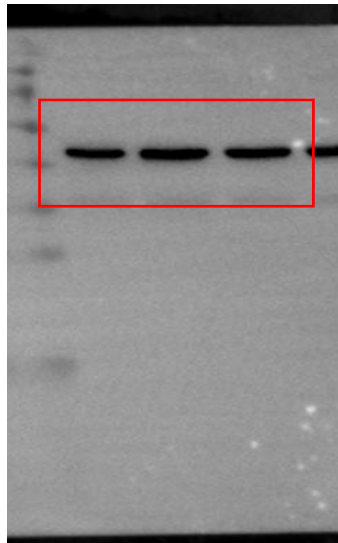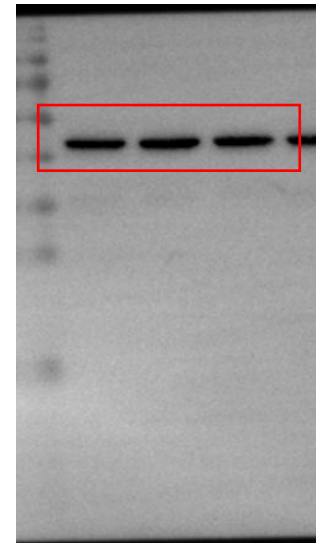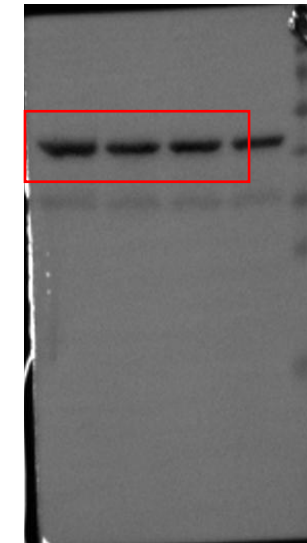

**Figure.S3A**

**Casepase3**

**ACTB**

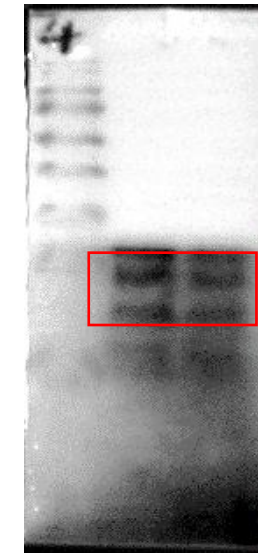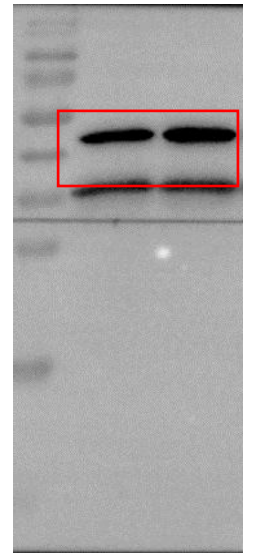

Figure.S3J

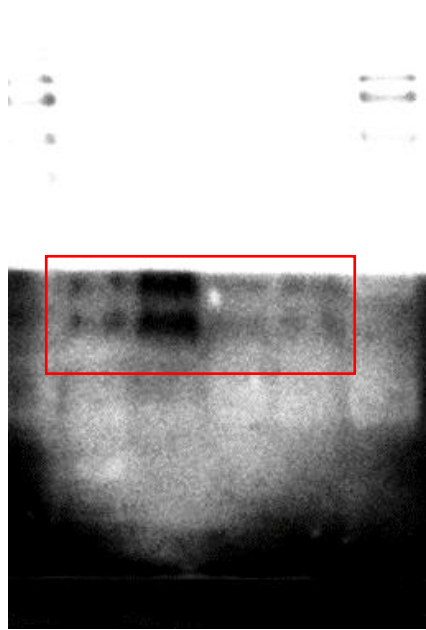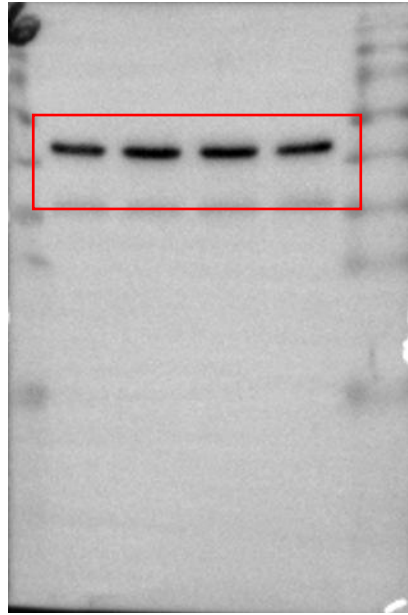

Figure.S3N

YAP

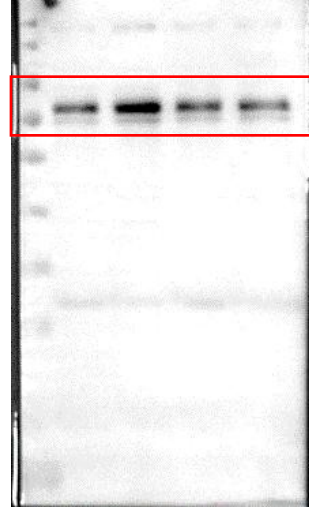

LaminB1

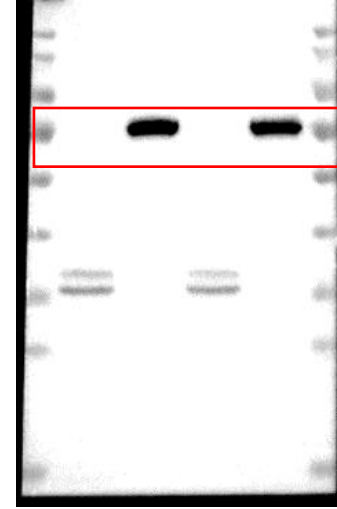

GAPDH

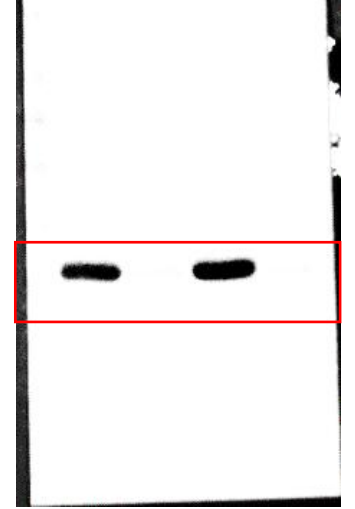

Supplement: 41419_2022_5474_MOESM3_ESM.pdf [file 41419_2022_5474_MOESM3_ESM.pdf]
