# Supplementary material for: USP36 facilitates esophageal squamous carcinoma progression via stabilizing YAP
Source: PubMed Central journal article supplement (PMC9722938; doi:10.1038/s41419-022-05474-5), 2022-12-05

Figure. S1

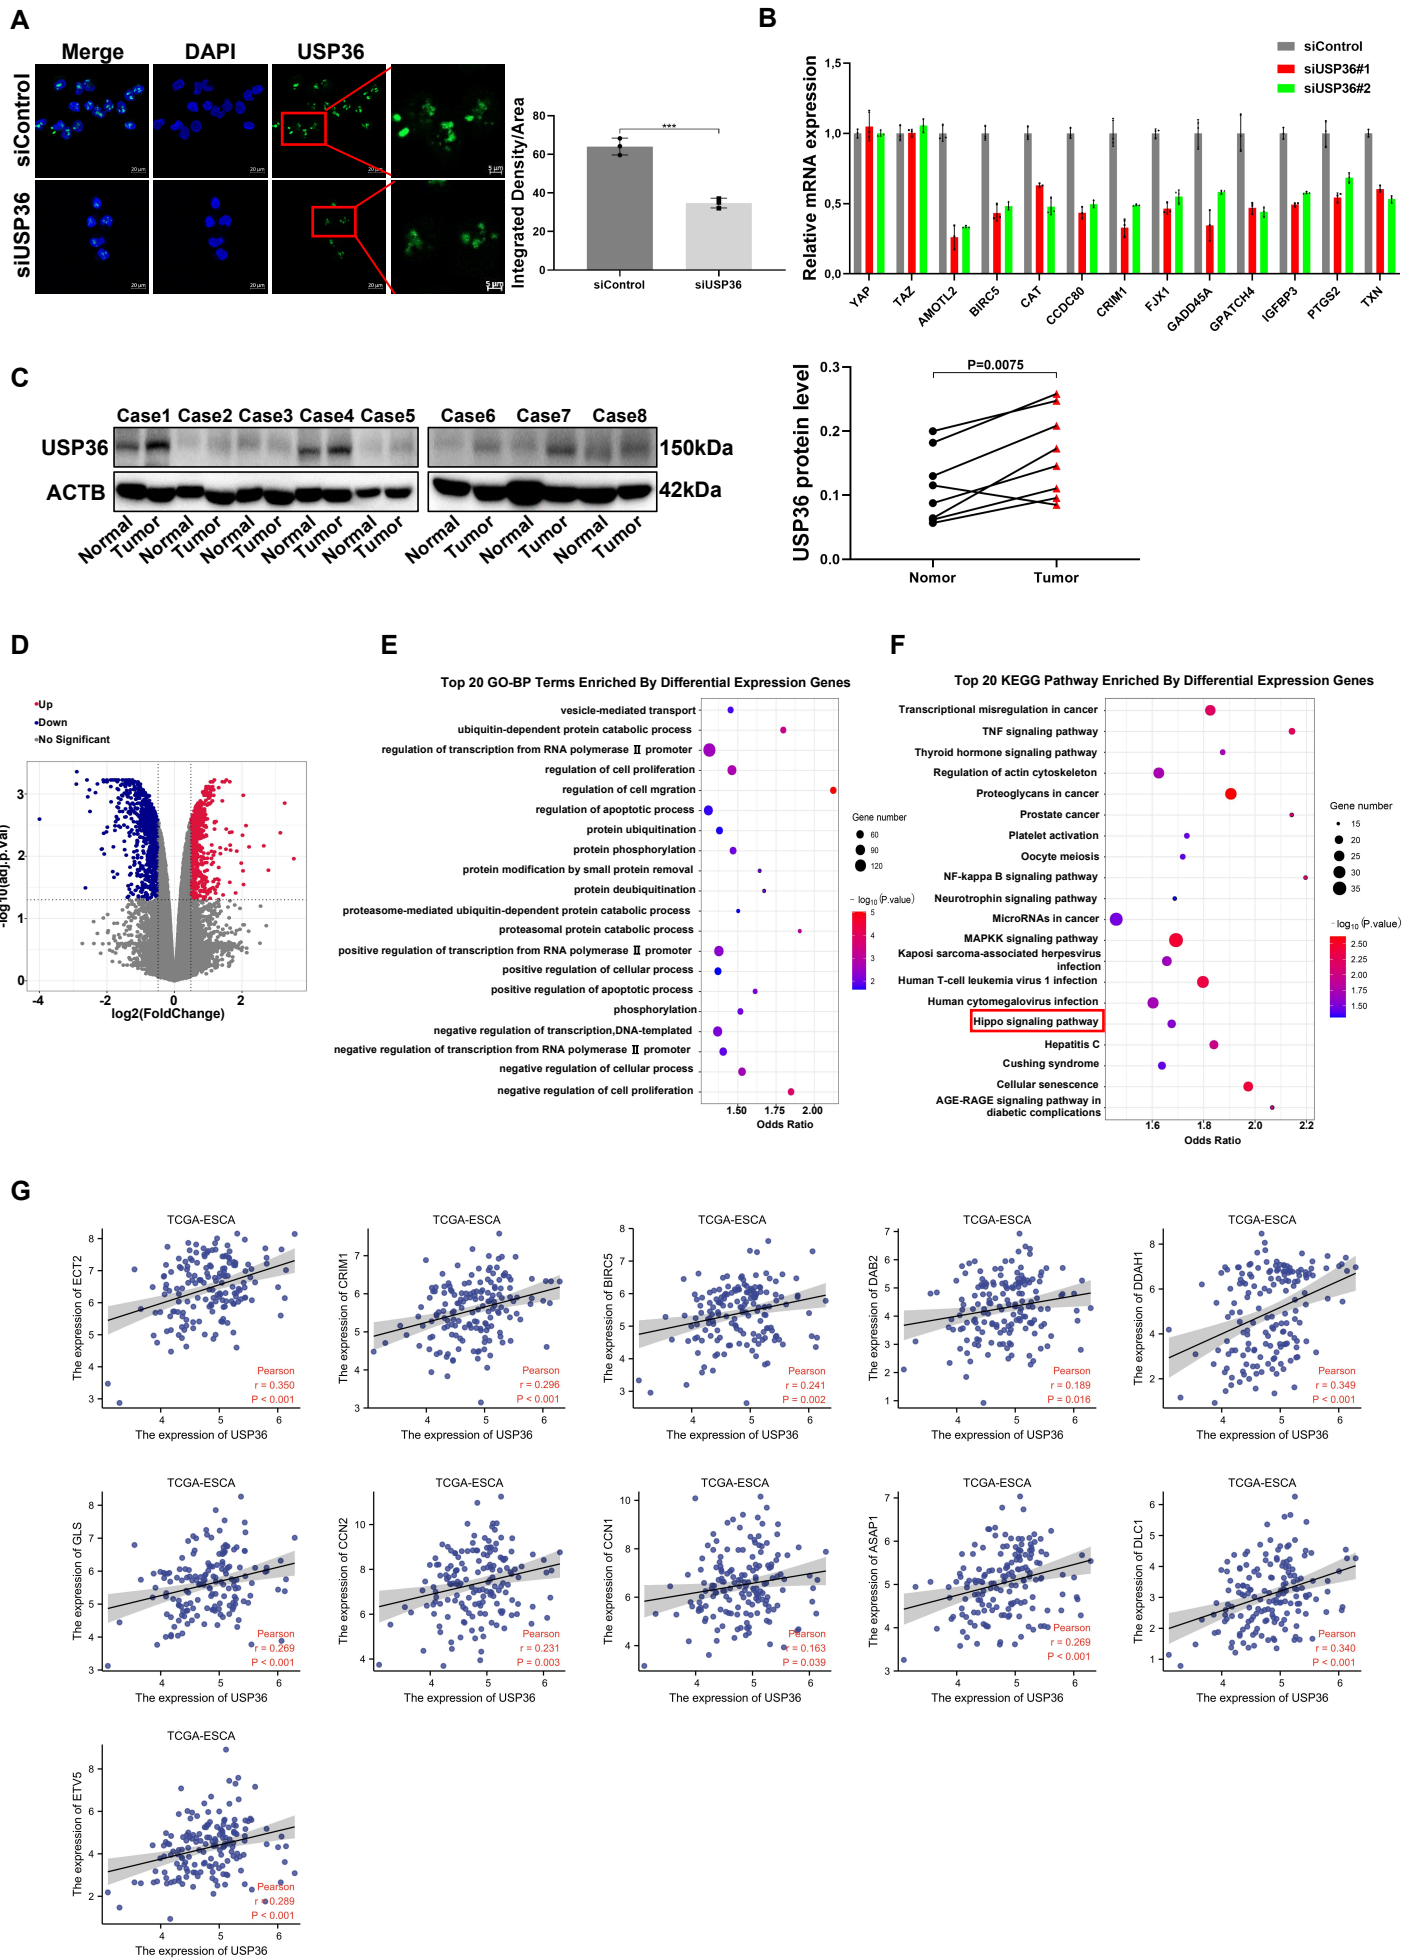

Supplement: 41419_2022_5474_MOESM4_ESM.pdf [file 41419_2022_5474_MOESM4_ESM.pdf]
