# Supplementary material for: USP36 facilitates esophageal squamous carcinoma progression via stabilizing YAP
Source: PubMed Central journal article supplement (PMC9722938; doi:10.1038/s41419-022-05474-5), 2022-12-05
Supplement: 41419_2022_5474_MOESM9_ESM.pdf [file 41419_2022_5474_MOESM9_ESM.pdf]

This document certifies that the manuscript

USP36 facilitates Hippo/YAP axis and esophageal squamous carcinoma progression  
via stabilizing YAP

prepared by the authors

Wenhao Zhang<sup>1\*</sup>, Junwen Luo<sup>1</sup>, Zhaohua Xiao<sup>1</sup>, Yifeng Zang<sup>2</sup>, Xin Li<sup>3</sup>, Youjia Zhou<sup>1</sup>, Jie  
Zhou<sup>1</sup>, Zhongxian Tian<sup>1,5</sup>, Jian Zhu<sup>2,4#</sup> and Xiaogang Zhao<sup>1,5#</sup>

was edited for proper English language, grammar, punctuation, spelling, and overall style  
by one or more of the highly qualified native English speaking editors at SNAS.

This certificate was issued on **July 5, 2022** and may be verified  
on the [SNAS website](#) using the verification code **BC38-8044-EFBA-3FFE-9F8P**.

Neither the research content nor the authors' intentions were altered in any way during the editing process. Documents receiving this certification should be English-ready for publication; however, the author has the ability to accept or reject our suggestions and changes. To verify the final SNAS edited version, please visit our verification page at [secure.authorservices.springernature.com/certificate/verify](https://secure.authorservices.springernature.com/certificate/verify).

If you have any questions or concerns about this edited document, please contact SNAS at [support@as.springernature.com](mailto:support@as.springernature.com).
